# Supplementary material
Source: publisher figshare collection journal article supplement (https://acs.figshare.com/ndownloader/files/4536520)
Supplement: Supplementary file 1 [file 4536520]

  
data_Ward_Soegiarto_compound_13 
  
_audit_creation_method            SHELXL-97 
_chemical_name_systematic 
; 
 ? 
; 
_chemical_name_common             05280 
_chemical_melting_point           ? 
_chemical_formula_moiety          'C23 H27 N4 O5 S' 
_chemical_formula_sum 
 'C23 H27 N4 O5 S' 
_chemical_formula_weight          471.55 
  
loop_ 
 _atom_type_symbol 
 _atom_type_description 
 _atom_type_scat_dispersion_real 
 _atom_type_scat_dispersion_imag 
 _atom_type_scat_source 
 'C'  'C'   0.0033   0.0016 
 'International Tables Vol C Tables 4.2.6.8 and 6.1.1.4' 
 'H'  'H'   0.0000   0.0000 
 'International Tables Vol C Tables 4.2.6.8 and 6.1.1.4' 
 'N'  'N'   0.0061   0.0033 
 'International Tables Vol C Tables 4.2.6.8 and 6.1.1.4' 
 'O'  'O'   0.0106   0.0060 
 'International Tables Vol C Tables 4.2.6.8 and 6.1.1.4' 
 'S'  'S'   0.1246   0.1234 
 'International Tables Vol C Tables 4.2.6.8 and 6.1.1.4' 
  
_symmetry_cell_setting            orthorhombic 
_symmetry_space_group_name_H-M    Aba2 
  
loop_ 
 _symmetry_equiv_pos_as_xyz 
 'x, y, z' 
 '-x, -y, z' 
 'x+1/2, -y+1/2, z' 
 '-x+1/2, y+1/2, z' 
 'x, y+1/2, z+1/2' 
 '-x, -y+1/2, z+1/2' 
 'x+1/2, -y+1, z+1/2' 
 '-x+1/2, y+1, z+1/2' 
  
_cell_length_a                    13.1383(14) 
_cell_length_b                    27.585(3) 
_cell_length_c                    12.4518(13) 
_cell_angle_alpha                 90.00 
_cell_angle_beta                  90.00 
_cell_angle_gamma                 90.00 
_cell_volume                      4512.7(8) 
_cell_formula_units_Z             8 
_cell_measurement_temperature     173(2) 
_cell_measurement_reflns_used     3450 
_cell_measurement_theta_min       2.37 
_cell_measurement_theta_max       25.03 
  
_exptl_crystal_description        plate 
_exptl_crystal_colour             yellow 
_exptl_crystal_size_max           0.5 
_exptl_crystal_size_mid           0.4 
_exptl_crystal_size_min           0.1 
_exptl_crystal_density_meas       ? 
_exptl_crystal_density_diffrn     1.388 
_exptl_crystal_density_method     'not measured' 
_exptl_crystal_F_000              1992 
_exptl_absorpt_coefficient_mu     0.187 
_exptl_absorpt_correction_type    multi-scan 
_exptl_absorpt_correction_T_min   0.878229 
_exptl_absorpt_correction_T_max   1.000000 
_exptl_absorpt_process_details    'SADABS, R. Blessing, 1995' 
  
_exptl_special_details 
; 
 ? 
; 
  
_diffrn_ambient_temperature       173(2) 
_diffrn_radiation_wavelength      0.71073 
_diffrn_radiation_type            MoK\a 
_diffrn_radiation_source          'normal-focus sealed tube' 
_diffrn_radiation_monochromator   graphite 
_diffrn_measurement_device_type   'Siemens SMART Platform CCD' 
_diffrn_measurement_method        'area detector, omega scans per phi' 
_diffrn_detector_area_resol_mean  ? 
_diffrn_standards_number          ? 
_diffrn_standards_interval_count  ? 
_diffrn_standards_interval_time   ? 
_diffrn_standards_decay_%         ? 
_diffrn_reflns_number             20245 
_diffrn_reflns_av_R_equivalents   0.0265 
_diffrn_reflns_av_sigmaI/netI     0.0192 
_diffrn_reflns_limit_h_min        -15 
_diffrn_reflns_limit_h_max        15 
_diffrn_reflns_limit_k_min        -32 
_diffrn_reflns_limit_k_max        32 
_diffrn_reflns_limit_l_min        -14 
_diffrn_reflns_limit_l_max        14 
_diffrn_reflns_theta_min          1.48 
_diffrn_reflns_theta_max          25.04 
_reflns_number_total              3995 
_reflns_number_gt                 3779 
_reflns_threshold_expression      >2sigma(I) 
  
_computing_data_collection        'SMART, Bruker' 
_computing_cell_refinement        'SAINT, Bruker' 
_computing_data_reduction         'SAINT, Bruker' 
_computing_structure_solution     'SHELXS-97 (Sheldrick, 1990)' 
_computing_structure_refinement   'SHELXL-97 (Sheldrick, 1997)' 
_computing_molecular_graphics     'SHELXTL, Bruker' 
_computing_publication_material   'Bruker SHELXTL' 
  
_refine_special_details 
; 
 Refinement of F^2^ against ALL reflections.  The weighted R-factor wR and 
 goodness of fit S are based on F^2^, conventional R-factors R are based 
 on F, with F set to zero for negative F^2^. The threshold expression of 
 F^2^ > 2sigma(F^2^) is used only for calculating R-factors(gt) etc. and is 
 not relevant to the choice of reflections for refinement.  R-factors based 
 on F^2^ are statistically about twice as large as those based on F, and R- 
 factors based on ALL data will be even larger. 
; 
  
_refine_ls_structure_factor_coef  Fsqd 
_refine_ls_matrix_type            full 
_refine_ls_weighting_scheme       calc 
_refine_ls_weighting_details 
 'calc w=1/[\s^2^(Fo^2^)+(0.0384P)^2^+4.4749P] where P=(Fo^2^+2Fc^2^)/3' 
_atom_sites_solution_primary      direct 
_atom_sites_solution_secondary    difmap 
_atom_sites_solution_hydrogens    geom 
_refine_ls_hydrogen_treatment     riding 
_refine_ls_extinction_method      none 
_refine_ls_extinction_coef        ? 
_refine_ls_abs_structure_details 
 'Flack H D (1983), Acta Cryst. A39, 876-881' 
_refine_ls_abs_structure_Flack    0.01(7) 
_refine_ls_number_reflns          3995 
_refine_ls_number_parameters      302 
_refine_ls_number_restraints      3 
_refine_ls_R_factor_all           0.0334 
_refine_ls_R_factor_gt            0.0308 
_refine_ls_wR_factor_ref          0.0773 
_refine_ls_wR_factor_gt           0.0758 
_refine_ls_goodness_of_fit_ref    0.945 
_refine_ls_restrained_S_all       0.945 
_refine_ls_shift/su_max           0.001 
_refine_ls_shift/su_mean          0.000 
  
loop_ 
 _atom_site_label 
 _atom_site_type_symbol 
 _atom_site_fract_x 
 _atom_site_fract_y 
 _atom_site_fract_z 
 _atom_site_U_iso_or_equiv 
 _atom_site_adp_type 
 _atom_site_occupancy 
 _atom_site_symmetry_multiplicity 
 _atom_site_calc_flag 
 _atom_site_refinement_flags 
 _atom_site_disorder_assembly 
 _atom_site_disorder_group 
C1 C 0.69755(17) 0.77988(7) 0.81161(17) 0.0334(5) Uani 1 1 d . . . 
N1 N 0.71225(14) 0.76763(7) 0.70961(15) 0.0359(4) Uani 1 1 d . . . 
H1A H 0.6632 0.7534 0.6732 0.043 Uiso 1 1 calc R . . 
H1B H 0.7710 0.7737 0.6785 0.043 Uiso 1 1 calc R . . 
N2 N 0.60933(15) 0.77076(7) 0.85844(15) 0.0440(5) Uani 1 1 d . . . 
H2A H 0.5988 0.7799 0.9253 0.053 Uiso 1 1 calc R . . 
H2B H 0.5611 0.7556 0.8228 0.053 Uiso 1 1 calc R . . 
N3 N 0.77088(15) 0.80276(6) 0.86459(16) 0.0412(5) Uani 1 1 d . . . 
H3A H 0.7610 0.8120 0.9314 0.049 Uiso 1 1 calc R . . 
H3B H 0.8294 0.8087 0.8329 0.049 Uiso 1 1 calc R . . 
C2 C 0.98886(14) 0.87231(6) 0.63986(19) 0.0288(4) Uani 1 1 d . . . 
C3 C 0.90544(16) 0.89885(8) 0.67469(19) 0.0359(5) Uani 1 1 d . . . 
H3C H 0.8451 0.8826 0.6965 0.043 Uiso 1 1 calc R . . 
C4 C 0.91020(15) 0.94864(8) 0.67762(19) 0.0337(5) Uani 1 1 d . . . 
H4A H 0.8531 0.9666 0.7020 0.040 Uiso 1 1 calc R . . 
C5 C 0.99824(14) 0.97308(7) 0.64507(19) 0.0277(4) Uani 1 1 d . . . 
C6 C 1.08180(15) 0.94585(7) 0.61172(17) 0.0297(5) Uani 1 1 d . . . 
H6A H 1.1426 0.9619 0.5909 0.036 Uiso 1 1 calc R . . 
C7 C 1.07756(16) 0.89545(7) 0.60839(16) 0.0293(4) Uani 1 1 d . . . 
H7A H 1.1347 0.8772 0.5849 0.035 Uiso 1 1 calc R . . 
S1 S 0.97823(4) 0.808310(17) 0.63779(5) 0.03187(12) Uani 1 1 d . . . 
O1 O 1.06860(13) 0.78952(5) 0.58624(13) 0.0408(4) Uani 1 1 d . . . 
O2 O 0.96815(12) 0.79347(5) 0.75034(13) 0.0393(4) Uani 1 1 d . . . 
O3 O 0.88456(12) 0.79821(5) 0.57892(12) 0.0371(4) Uani 1 1 d . . . 
C8 C 1.14946(17) 1.09207(8) 0.0872(2) 0.0372(5) Uani 1 1 d . . . 
C9 C 1.14594(16) 1.09737(8) 0.2005(2) 0.0352(5) Uani 1 1 d . . . 
H9A H 1.1486 1.1291 0.2298 0.042 Uiso 1 1 calc R . . 
C10 C 1.13895(15) 1.05932(8) 0.26877(18) 0.0307(5) Uani 1 1 d . . . 
C11 C 1.13291(14) 1.01112(8) 0.22500(16) 0.0274(4) Uani 1 1 d . B . 
C12 C 1.13387(14) 1.00535(7) 0.11305(16) 0.0277(4) Uani 1 1 d . . . 
C13 C 1.12706(15) 0.96094(8) 0.06168(17) 0.0287(5) Uani 1 1 d . B . 
C14 C 1.1282(2) 0.95667(9) -0.05889(19) 0.0446(6) Uani 1 1 d D . . 
H14A H 1.0616 0.9678 -0.0867 0.054 Uiso 1 1 calc R A 1 
H14B H 1.1808 0.9789 -0.0874 0.054 Uiso 1 1 calc R A 1 
C15 C 1.1478(8) 0.9085(3) -0.1005(6) 0.0444(8) Uani 0.288(5) 1 d PD B 1 
H15A H 1.2224 0.9040 -0.1059 0.053 Uiso 0.288(5) 1 calc PR B 1 
H15B H 1.1198 0.9066 -0.1742 0.053 Uiso 0.288(5) 1 calc PR B 1 
C15' C 1.0727(3) 0.91212(12) -0.0930(3) 0.0444(8) Uani 0.712(5) 1 d PD B 2 
H15C H 0.9990 0.9170 -0.0806 0.053 Uiso 0.712(5) 1 calc PR B 2 
H15D H 1.0829 0.9075 -0.1711 0.053 Uiso 0.712(5) 1 calc PR B 2 
C16 C 1.1051(2) 0.86745(10) -0.0365(2) 0.0491(7) Uani 1 1 d D . . 
H16A H 1.0325 0.8633 -0.0557 0.059 Uiso 1 1 calc R B 1 
H16B H 1.1411 0.8373 -0.0568 0.059 Uiso 1 1 calc R B 1 
C17 C 1.1050(2) 0.82943(8) 0.1428(2) 0.0512(6) Uani 1 1 d . . . 
H17A H 1.1392 0.8027 0.1039 0.061 Uiso 1 1 calc R B . 
H17B H 1.0323 0.8207 0.1509 0.061 Uiso 1 1 calc R . . 
C18 C 1.1524(2) 0.83480(8) 0.2528(2) 0.0471(6) Uani 1 1 d . B . 
H18A H 1.2269 0.8393 0.2459 0.057 Uiso 1 1 calc R . . 
H18B H 1.1399 0.8052 0.2958 0.057 Uiso 1 1 calc R . . 
C19 C 1.10552(19) 0.87848(8) 0.30840(19) 0.0399(5) Uani 1 1 d . . . 
H19A H 1.0324 0.8723 0.3219 0.048 Uiso 1 1 calc R B . 
H19B H 1.1393 0.8836 0.3785 0.048 Uiso 1 1 calc R . . 
C20 C 1.11688(15) 0.92331(7) 0.24037(17) 0.0295(5) Uani 1 1 d . B . 
C21 C 1.12442(15) 0.96857(8) 0.28554(16) 0.0289(5) Uani 1 1 d . . . 
H21A H 1.1238 0.9711 0.3616 0.035 Uiso 1 1 calc R B . 
C22 C 1.11864(14) 0.91891(7) 0.12648(18) 0.0292(4) Uani 1 1 d . . . 
C23 C 1.13704(18) 1.06663(9) 0.3881(2) 0.0417(5) Uani 1 1 d . . . 
H23A H 1.1428 1.1013 0.4043 0.063 Uiso 1 1 calc R . . 
H23B H 1.1942 1.0492 0.4208 0.063 Uiso 1 1 calc R . . 
H23C H 1.0729 1.0541 0.4172 0.063 Uiso 1 1 calc R . . 
N4 N 1.11298(16) 0.87385(6) 0.07947(15) 0.0385(5) Uani 1 1 d . B . 
O4 O 1.14288(12) 1.04532(5) 0.04645(12) 0.0348(4) Uani 1 1 d . . . 
O5 O 1.15871(14) 1.12416(6) 0.02075(15) 0.0505(5) Uani 1 1 d . . . 
  
loop_ 
 _atom_site_aniso_label 
 _atom_site_aniso_U_11 
 _atom_site_aniso_U_22 
 _atom_site_aniso_U_33 
 _atom_site_aniso_U_23 
 _atom_site_aniso_U_13 
 _atom_site_aniso_U_12 
C1 0.0451(13) 0.0235(10) 0.0315(11) -0.0020(9) -0.0046(10) 0.0062(9) 
N1 0.0380(10) 0.0368(10) 0.0330(10) -0.0031(8) -0.0010(8) -0.0027(8) 
N2 0.0444(11) 0.0557(13) 0.0319(11) -0.0105(10) 0.0018(8) -0.0046(10) 
N3 0.0465(13) 0.0403(10) 0.0369(11) -0.0081(9) -0.0069(9) -0.0032(9) 
C2 0.0303(9) 0.0300(9) 0.0261(9) -0.0011(10) -0.0044(10) 0.0015(7) 
C3 0.0265(10) 0.0331(11) 0.0481(14) 0.0008(10) 0.0021(9) -0.0032(9) 
C4 0.0257(10) 0.0301(11) 0.0454(13) -0.0019(9) 0.0044(9) 0.0029(8) 
C5 0.0270(9) 0.0308(9) 0.0252(9) 0.0010(9) -0.0023(9) -0.0004(7) 
C6 0.0259(10) 0.0346(11) 0.0286(11) 0.0009(9) 0.0031(8) -0.0019(8) 
C7 0.0321(10) 0.0334(10) 0.0224(10) -0.0001(8) 0.0004(8) 0.0033(8) 
S1 0.0384(3) 0.0274(2) 0.0298(3) -0.0018(2) -0.0038(3) 0.0018(2) 
O1 0.0457(9) 0.0351(8) 0.0417(9) -0.0032(7) 0.0021(8) 0.0096(7) 
O2 0.0501(10) 0.0360(8) 0.0317(8) 0.0040(7) -0.0032(7) 0.0037(7) 
O3 0.0416(9) 0.0344(8) 0.0352(9) -0.0038(7) -0.0062(7) -0.0061(7) 
C8 0.0311(12) 0.0288(12) 0.0516(15) 0.0030(11) 0.0066(10) -0.0074(9) 
C9 0.0290(11) 0.0289(11) 0.0476(14) -0.0067(10) 0.0034(10) -0.0055(9) 
C10 0.0208(10) 0.0335(12) 0.0379(12) -0.0064(10) -0.0010(9) -0.0020(8) 
C11 0.0211(10) 0.0309(11) 0.0303(11) -0.0039(9) -0.0003(8) -0.0013(8) 
C12 0.0233(10) 0.0270(10) 0.0329(12) 0.0019(9) 0.0033(8) -0.0030(7) 
C13 0.0282(11) 0.0321(11) 0.0257(11) -0.0030(9) 0.0043(8) -0.0041(8) 
C14 0.0593(16) 0.0479(15) 0.0266(12) -0.0040(10) 0.0071(11) -0.0114(12) 
C15 0.056(2) 0.0487(18) 0.0284(16) -0.0066(13) -0.0022(17) -0.0050(17) 
C15' 0.056(2) 0.0487(18) 0.0284(16) -0.0066(13) -0.0022(17) -0.0050(17) 
C16 0.0679(18) 0.0420(14) 0.0375(13) -0.0129(11) 0.0013(12) -0.0065(13) 
C17 0.0746(17) 0.0273(11) 0.0518(15) -0.0013(12) -0.0003(15) 0.0005(11) 
C18 0.0627(16) 0.0325(12) 0.0460(15) 0.0050(11) 0.0042(12) 0.0085(11) 
C19 0.0488(14) 0.0347(12) 0.0360(13) 0.0073(10) 0.0008(11) 0.0084(10) 
C20 0.0270(10) 0.0310(11) 0.0306(11) 0.0009(9) -0.0013(9) 0.0025(8) 
C21 0.0258(11) 0.0362(12) 0.0246(10) -0.0002(9) -0.0011(8) 0.0014(8) 
C22 0.0258(10) 0.0289(10) 0.0328(12) -0.0035(9) -0.0010(9) 0.0003(7) 
C23 0.0436(12) 0.0412(13) 0.0405(13) -0.0141(11) -0.0068(11) 0.0008(10) 
N4 0.0528(13) 0.0262(9) 0.0365(11) -0.0051(8) 0.0014(9) -0.0015(8) 
O4 0.0416(9) 0.0293(8) 0.0334(8) 0.0028(7) 0.0089(7) -0.0063(7) 
O5 0.0568(11) 0.0354(9) 0.0592(12) 0.0105(8) 0.0121(9) -0.0103(8) 
  
_geom_special_details 
; 
 All esds (except the esd in the dihedral angle between two l.s. planes) 
 are estimated using the full covariance matrix.  The cell esds are taken 
 into account individually in the estimation of esds in distances, angles 
 and torsion angles; correlations between esds in cell parameters are only 
 used when they are defined by crystal symmetry.  An approximate (isotropic) 
 treatment of cell esds is used for estimating esds involving l.s. planes. 
; 
  
loop_ 
 _geom_bond_atom_site_label_1 
 _geom_bond_atom_site_label_2 
 _geom_bond_distance 
 _geom_bond_site_symmetry_2 
 _geom_bond_publ_flag 
C1 N2 1.322(3) . ? 
C1 N3 1.327(3) . ? 
C1 N1 1.328(3) . ? 
N1 H1A 0.8800 . ? 
N1 H1B 0.8800 . ? 
N2 H2A 0.8800 . ? 
N2 H2B 0.8800 . ? 
N3 H3A 0.8800 . ? 
N3 H3B 0.8800 . ? 
C2 C7 1.385(3) . ? 
C2 C3 1.387(3) . ? 
C2 S1 1.7712(18) . ? 
C3 C4 1.375(3) . ? 
C3 H3C 0.9500 . ? 
C4 C5 1.399(3) . ? 
C4 H4A 0.9500 . ? 
C5 C6 1.394(3) . ? 
C5 C5 1.486(4) 2_775 ? 
C6 C7 1.392(3) . ? 
C6 H6A 0.9500 . ? 
C7 H7A 0.9500 . ? 
S1 O1 1.4458(17) . ? 
S1 O3 1.4594(16) . ? 
S1 O2 1.4660(16) . ? 
C8 O5 1.218(3) . ? 
C8 O4 1.388(3) . ? 
C8 C9 1.419(3) . ? 
C9 C10 1.354(3) . ? 
C9 H9A 0.9500 . ? 
C10 C11 1.439(3) . ? 
C10 C23 1.500(3) . ? 
C11 C21 1.399(3) . ? 
C11 C12 1.403(3) . ? 
C12 C13 1.385(3) . ? 
C12 O4 1.385(2) . ? 
C13 C22 1.417(3) . ? 
C13 C14 1.506(3) . ? 
C14 C15 1.450(8) . ? 
C14 C15' 1.491(4) . ? 
C14 H14A 0.9900 . ? 
C14 H14B 0.9900 . ? 
C15 C16 1.494(8) . ? 
C15 H15A 0.9900 . ? 
C15 H15B 0.9900 . ? 
C15' C16 1.481(4) . ? 
C15' H15C 0.9900 . ? 
C15' H15D 0.9900 . ? 
C16 N4 1.459(3) . ? 
C16 H16A 0.9900 . ? 
C16 H16B 0.9900 . ? 
C17 N4 1.461(3) . ? 
C17 C18 1.513(4) . ? 
C17 H17A 0.9900 . ? 
C17 H17B 0.9900 . ? 
C18 C19 1.520(3) . ? 
C18 H18A 0.9900 . ? 
C18 H18B 0.9900 . ? 
C19 C20 1.506(3) . ? 
C19 H19A 0.9900 . ? 
C19 H19B 0.9900 . ? 
C20 C21 1.373(3) . ? 
C20 C22 1.424(3) . ? 
C21 H21A 0.9500 . ? 
C22 N4 1.376(3) . ? 
C23 H23A 0.9800 . ? 
C23 H23B 0.9800 . ? 
C23 H23C 0.9800 . ? 
  
loop_ 
 _geom_angle_atom_site_label_1 
 _geom_angle_atom_site_label_2 
 _geom_angle_atom_site_label_3 
 _geom_angle 
 _geom_angle_site_symmetry_1 
 _geom_angle_site_symmetry_3 
 _geom_angle_publ_flag 
N2 C1 N3 120.5(2) . . ? 
N2 C1 N1 120.1(2) . . ? 
N3 C1 N1 119.4(2) . . ? 
C1 N1 H1A 120.0 . . ? 
C1 N1 H1B 120.0 . . ? 
H1A N1 H1B 120.0 . . ? 
C1 N2 H2A 120.0 . . ? 
C1 N2 H2B 120.0 . . ? 
H2A N2 H2B 120.0 . . ? 
C1 N3 H3A 120.0 . . ? 
C1 N3 H3B 120.0 . . ? 
H3A N3 H3B 120.0 . . ? 
C7 C2 C3 120.66(18) . . ? 
C7 C2 S1 121.42(15) . . ? 
C3 C2 S1 117.92(15) . . ? 
C4 C3 C2 119.95(19) . . ? 
C4 C3 H3C 120.0 . . ? 
C2 C3 H3C 120.0 . . ? 
C3 C4 C5 120.74(19) . . ? 
C3 C4 H4A 119.6 . . ? 
C5 C4 H4A 119.6 . . ? 
C6 C5 C4 118.55(17) . . ? 
C6 C5 C5 120.9(2) . 2_775 ? 
C4 C5 C5 120.5(2) . 2_775 ? 
C7 C6 C5 121.04(19) . . ? 
C7 C6 H6A 119.5 . . ? 
C5 C6 H6A 119.5 . . ? 
C2 C7 C6 119.04(19) . . ? 
C2 C7 H7A 120.5 . . ? 
C6 C7 H7A 120.5 . . ? 
O1 S1 O3 113.65(9) . . ? 
O1 S1 O2 113.49(9) . . ? 
O3 S1 O2 110.53(10) . . ? 
O1 S1 C2 107.41(10) . . ? 
O3 S1 C2 105.32(9) . . ? 
O2 S1 C2 105.75(10) . . ? 
O5 C8 O4 115.7(2) . . ? 
O5 C8 C9 127.1(2) . . ? 
O4 C8 C9 117.2(2) . . ? 
C10 C9 C8 123.1(2) . . ? 
C10 C9 H9A 118.4 . . ? 
C8 C9 H9A 118.4 . . ? 
C9 C10 C11 118.8(2) . . ? 
C9 C10 C23 121.3(2) . . ? 
C11 C10 C23 119.9(2) . . ? 
C21 C11 C12 116.16(19) . . ? 
C21 C11 C10 125.12(19) . . ? 
C12 C11 C10 118.72(19) . . ? 
C13 C12 O4 115.68(17) . . ? 
C13 C12 C11 123.96(18) . . ? 
O4 C12 C11 120.35(18) . . ? 
C12 C13 C22 117.77(18) . . ? 
C12 C13 C14 121.94(19) . . ? 
C22 C13 C14 120.29(19) . . ? 
C15 C14 C15' 39.6(4) . . ? 
C15 C14 C13 115.4(4) . . ? 
C15' C14 C13 110.1(2) . . ? 
C15 C14 H14A 108.4 . . ? 
C15' C14 H14A 73.9 . . ? 
C13 C14 H14A 108.4 . . ? 
C15 C14 H14B 108.4 . . ? 
C15' C14 H14B 138.6 . . ? 
C13 C14 H14B 108.4 . . ? 
H14A C14 H14B 107.5 . . ? 
C14 C15 C16 115.9(6) . . ? 
C14 C15 H15A 108.3 . . ? 
C16 C15 H15A 108.3 . . ? 
C14 C15 H15B 108.3 . . ? 
C16 C15 H15B 108.3 . . ? 
H15A C15 H15B 107.4 . . ? 
C16 C15' C14 114.2(3) . . ? 
C16 C15' H15C 108.7 . . ? 
C14 C15' H15C 108.7 . . ? 
C16 C15' H15D 108.7 . . ? 
C14 C15' H15D 108.7 . . ? 
H15C C15' H15D 107.6 . . ? 
N4 C16 C15' 112.9(2) . . ? 
N4 C16 C15 114.2(4) . . ? 
C15' C16 C15 39.1(4) . . ? 
N4 C16 H16A 108.7 . . ? 
C15' C16 H16A 72.8 . . ? 
C15 C16 H16A 108.7 . . ? 
N4 C16 H16B 108.7 . . ? 
C15' C16 H16B 135.6 . . ? 
C15 C16 H16B 108.7 . . ? 
H16A C16 H16B 107.6 . . ? 
N4 C17 C18 112.1(2) . . ? 
N4 C17 H17A 109.2 . . ? 
C18 C17 H17A 109.2 . . ? 
N4 C17 H17B 109.2 . . ? 
C18 C17 H17B 109.2 . . ? 
H17A C17 H17B 107.9 . . ? 
C17 C18 C19 108.9(2) . . ? 
C17 C18 H18A 109.9 . . ? 
C19 C18 H18A 109.9 . . ? 
C17 C18 H18B 109.9 . . ? 
C19 C18 H18B 109.9 . . ? 
H18A C18 H18B 108.3 . . ? 
C20 C19 C18 110.8(2) . . ? 
C20 C19 H19A 109.5 . . ? 
C18 C19 H19A 109.5 . . ? 
C20 C19 H19B 109.5 . . ? 
C18 C19 H19B 109.5 . . ? 
H19A C19 H19B 108.1 . . ? 
C21 C20 C22 119.0(2) . . ? 
C21 C20 C19 121.6(2) . . ? 
C22 C20 C19 119.46(19) . . ? 
C20 C21 C11 123.21(19) . . ? 
C20 C21 H21A 118.4 . . ? 
C11 C21 H21A 118.4 . . ? 
N4 C22 C13 120.1(2) . . ? 
N4 C22 C20 120.00(19) . . ? 
C13 C22 C20 119.92(19) . . ? 
C10 C23 H23A 109.5 . . ? 
C10 C23 H23B 109.5 . . ? 
H23A C23 H23B 109.5 . . ? 
C10 C23 H23C 109.5 . . ? 
H23A C23 H23C 109.5 . . ? 
H23B C23 H23C 109.5 . . ? 
C22 N4 C16 122.31(19) . . ? 
C22 N4 C17 122.2(2) . . ? 
C16 N4 C17 115.30(19) . . ? 
C12 O4 C8 121.75(17) . . ? 
  
loop_ 
 _geom_torsion_atom_site_label_1 
 _geom_torsion_atom_site_label_2 
 _geom_torsion_atom_site_label_3 
 _geom_torsion_atom_site_label_4 
 _geom_torsion 
 _geom_torsion_site_symmetry_1 
 _geom_torsion_site_symmetry_2 
 _geom_torsion_site_symmetry_3 
 _geom_torsion_site_symmetry_4 
 _geom_torsion_publ_flag 
C7 C2 C3 C4 0.4(3) . . . . ? 
S1 C2 C3 C4 -179.98(18) . . . . ? 
C2 C3 C4 C5 0.5(3) . . . . ? 
C3 C4 C5 C6 -1.3(3) . . . . ? 
C3 C4 C5 C5 178.01(17) . . . 2_775 ? 
C4 C5 C6 C7 1.4(3) . . . . ? 
C5 C5 C6 C7 -177.93(15) 2_775 . . . ? 
C3 C2 C7 C6 -0.3(3) . . . . ? 
S1 C2 C7 C6 -179.93(16) . . . . ? 
C5 C6 C7 C2 -0.6(3) . . . . ? 
C7 C2 S1 O1 -7.5(2) . . . . ? 
C3 C2 S1 O1 172.81(18) . . . . ? 
C7 C2 S1 O3 -128.97(18) . . . . ? 
C3 C2 S1 O3 51.4(2) . . . . ? 
C7 C2 S1 O2 113.96(19) . . . . ? 
C3 C2 S1 O2 -65.7(2) . . . . ? 
O5 C8 C9 C10 -177.7(2) . . . . ? 
O4 C8 C9 C10 1.6(4) . . . . ? 
C8 C9 C10 C11 -1.2(3) . . . . ? 
C8 C9 C10 C23 179.1(2) . . . . ? 
C9 C10 C11 C21 -179.33(19) . . . . ? 
C23 C10 C11 C21 0.4(3) . . . . ? 
C9 C10 C11 C12 -0.4(3) . . . . ? 
C23 C10 C11 C12 179.39(19) . . . . ? 
C21 C11 C12 C13 0.0(3) . . . . ? 
C10 C11 C12 C13 -179.07(18) . . . . ? 
C21 C11 C12 O4 -179.46(17) . . . . ? 
C10 C11 C12 O4 1.5(3) . . . . ? 
O4 C12 C13 C22 179.45(17) . . . . ? 
C11 C12 C13 C22 0.0(3) . . . . ? 
O4 C12 C13 C14 -0.7(3) . . . . ? 
C11 C12 C13 C14 179.9(2) . . . . ? 
C12 C13 C14 C15 164.2(5) . . . . ? 
C22 C13 C14 C15 -15.9(5) . . . . ? 
C12 C13 C14 C15' -153.1(2) . . . . ? 
C22 C13 C14 C15' 26.8(3) . . . . ? 
C15' C14 C15 C16 -56.1(6) . . . . ? 
C13 C14 C15 C16 35.1(8) . . . . ? 
C15 C14 C15' C16 55.6(6) . . . . ? 
C13 C14 C15' C16 -50.3(3) . . . . ? 
C14 C15' C16 N4 46.6(4) . . . . ? 
C14 C15' C16 C15 -54.0(5) . . . . ? 
C14 C15 C16 N4 -39.7(8) . . . . ? 
C14 C15 C16 C15' 57.5(6) . . . . ? 
N4 C17 C18 C19 54.2(3) . . . . ? 
C17 C18 C19 C20 -55.4(3) . . . . ? 
C18 C19 C20 C21 -150.4(2) . . . . ? 
C18 C19 C20 C22 30.4(3) . . . . ? 
C22 C20 C21 C11 0.6(3) . . . . ? 
C19 C20 C21 C11 -178.6(2) . . . . ? 
C12 C11 C21 C20 -0.3(3) . . . . ? 
C10 C11 C21 C20 178.69(19) . . . . ? 
C12 C13 C22 N4 -179.16(19) . . . . ? 
C14 C13 C22 N4 1.0(3) . . . . ? 
C12 C13 C22 C20 0.3(3) . . . . ? 
C14 C13 C22 C20 -179.5(2) . . . . ? 
C21 C20 C22 N4 178.87(18) . . . . ? 
C19 C20 C22 N4 -1.9(3) . . . . ? 
C21 C20 C22 C13 -0.6(3) . . . . ? 
C19 C20 C22 C13 178.62(19) . . . . ? 
C13 C22 N4 C16 -6.2(3) . . . . ? 
C20 C22 N4 C16 174.3(2) . . . . ? 
C13 C22 N4 C17 179.6(2) . . . . ? 
C20 C22 N4 C17 0.1(3) . . . . ? 
C15' C16 N4 C22 -17.5(4) . . . . ? 
C15 C16 N4 C22 25.3(5) . . . . ? 
C15' C16 N4 C17 157.1(3) . . . . ? 
C15 C16 N4 C17 -160.1(5) . . . . ? 
C18 C17 N4 C22 -27.3(3) . . . . ? 
C18 C17 N4 C16 158.1(2) . . . . ? 
C13 C12 O4 C8 179.41(19) . . . . ? 
C11 C12 O4 C8 -1.1(3) . . . . ? 
O5 C8 O4 C12 178.92(19) . . . . ? 
C9 C8 O4 C12 -0.4(3) . . . . ? 
  
loop_ 
 _geom_hbond_atom_site_label_D 
 _geom_hbond_atom_site_label_H 
 _geom_hbond_atom_site_label_A 
 _geom_hbond_distance_DH 
 _geom_hbond_distance_HA 
 _geom_hbond_distance_DA 
 _geom_hbond_angle_DHA 
 _geom_hbond_site_symmetry_A 
N1 H1A O1  0.88 2.03 2.900(2) 169.5 3_465 
N1 H1B O3  0.88 2.05 2.913(2) 165.0 . 
N2 H2A O3  0.88 1.99 2.849(2) 164.6 8_645 
N2 H2B O2  0.88 2.03 2.897(2) 166.7 3_465 
N3 H3A O5  0.88 2.34 2.950(2) 127.0 2_776 
N3 H3B O2  0.88 2.13 2.968(3) 157.8 . 
  
_diffrn_measured_fraction_theta_max    1.000 
_diffrn_reflns_theta_full              25.04 
_diffrn_measured_fraction_theta_full   1.000 
_refine_diff_density_max    0.269 
_refine_diff_density_min   -0.218 
_refine_diff_density_rms    0.039 
